# Supplementary material for: Immune Repertoire Profiling Reveals that Clonally Expanded B and T Cells Infiltrating Diseased Human Kidneys Can Also Be Tracked in Blood
Source: PLoS One. 2015 Nov 23;10(11):e0143125. doi: 10.1371/journal.pone.0143125 (PMC4658119; doi:10.1371/journal.pone.0143125)
Supplement: S1 File — The list of nucleotide sequences is provided for each forward and reverse primer for all IGH and TRB primer sets. Also the concentration for each primer in the first amplification is given. The information includes the target sequence in 5’-3’ and the Nextera adaptor sequence in 5’-3’. (XLSX) [file pone.0143125.s009.xlsx]

## Sheet: Illumina Primer
S1 File. Biomed-2 primer panel
Primer Set	Concentration in PCR	Target Sequence 5'-3'	Nextera Adaptor Sequence 5'-3'	Nextera Adaptor+Targetsequence 5'-3'	Forward/Reverse
IGH Primer Set 1+2+3	1.0 µM	CTTACCTGAGGAGACGGTGACC	GTCTCGTGGGCTCGGAGATGTGTATAAGAGACAG	GTCTCGTGGGCTCGGAGATGTGTATAAGAGACAGCTTACCTGAGGAGACGGTGACC	R
IGH Primer Set 1	0.17 µM	GGCCTCAGTGAAGGTCTCCTGCAAG	TCGTCGGCAGCGTCAGATGTGTATAAGAGACAG	TCGTCGGCAGCGTCAGATGTGTATAAGAGACAGGGCCTCAGTGAAGGTCTCCTGCAAG	F
IGH Primer Set 1	0.17 µM	GTCTGGTCCTACGCTGGTGAAACCC	TCGTCGGCAGCGTCAGATGTGTATAAGAGACAG	TCGTCGGCAGCGTCAGATGTGTATAAGAGACAGGTCTGGTCCTACGCTGGTGAAACCC	F
IGH Primer Set 1	0.17 µM	CTGGGGGGTCCCTGAGACTCTCCTG	TCGTCGGCAGCGTCAGATGTGTATAAGAGACAG	TCGTCGGCAGCGTCAGATGTGTATAAGAGACAGCTGGGGGGTCCCTGAGACTCTCCTG	F
IGH Primer Set 1	0.17 µM	CTTCGGAGACCCTGTCCCTCACCTG	TCGTCGGCAGCGTCAGATGTGTATAAGAGACAG	TCGTCGGCAGCGTCAGATGTGTATAAGAGACAGCTTCGGAGACCCTGTCCCTCACCTG	F
IGH Primer Set 1	0.17 µM	CGGGGAGTCTCTGAAGATCTCCTGT	TCGTCGGCAGCGTCAGATGTGTATAAGAGACAG	TCGTCGGCAGCGTCAGATGTGTATAAGAGACAGCGGGGAGTCTCTGAAGATCTCCTGT	F
IGH Primer Set 1	0.17 µM	TCGCAGACCCTCTCACTCACCTGTG	TCGTCGGCAGCGTCAGATGTGTATAAGAGACAG	TCGTCGGCAGCGTCAGATGTGTATAAGAGACAGTCGCAGACCCTCTCACTCACCTGTG	F
IGH Primer Set 2	0.14 µM	CTGGGTGCGACAGGCCCCTGGACAA	TCGTCGGCAGCGTCAGATGTGTATAAGAGACAG	TCGTCGGCAGCGTCAGATGTGTATAAGAGACAGCTGGGTGCGACAGGCCCCTGGACAA	F
IGH Primer Set 2	0.14 µM	TGGATCCGTCAGCCCCCAGGGAAGG	TCGTCGGCAGCGTCAGATGTGTATAAGAGACAG	TCGTCGGCAGCGTCAGATGTGTATAAGAGACAGTGGATCCGTCAGCCCCCAGGGAAGG	F
IGH Primer Set 2	0.14 µM	GGTCCGCCAGGCTCCAGGGAA	TCGTCGGCAGCGTCAGATGTGTATAAGAGACAG	TCGTCGGCAGCGTCAGATGTGTATAAGAGACAGGGTCCGCCAGGCTCCAGGGAA	F
IGH Primer Set 2	0.14 µM	TGGATCCGCCAGCCCCCAGGGAAGG	TCGTCGGCAGCGTCAGATGTGTATAAGAGACAG	TCGTCGGCAGCGTCAGATGTGTATAAGAGACAGTGGATCCGCCAGCCCCCAGGGAAGG	F
IGH Primer Set 2	0.14 µM	GGGTGCGCCAGATGCCCGGGAAAGG	TCGTCGGCAGCGTCAGATGTGTATAAGAGACAG	TCGTCGGCAGCGTCAGATGTGTATAAGAGACAGGGGTGCGCCAGATGCCCGGGAAAGG	F
IGH Primer Set 2	0.14 µM	TGGATCAGGCAGTCCCCATCGAGAG	TCGTCGGCAGCGTCAGATGTGTATAAGAGACAG	TCGTCGGCAGCGTCAGATGTGTATAAGAGACAGTGGATCAGGCAGTCCCCATCGAGAG	F
IGH Primer Set 2	0.14 µM	TTGGGTGCGACAGGCCCCTGGACAA	TCGTCGGCAGCGTCAGATGTGTATAAGAGACAG	TCGTCGGCAGCGTCAGATGTGTATAAGAGACAGTTGGGTGCGACAGGCCCCTGGACAA	F
IGH Primer Set 3	0.14 µM	TGGAGCTGAGCAGCCTGAGATCTGA	TCGTCGGCAGCGTCAGATGTGTATAAGAGACAG	TCGTCGGCAGCGTCAGATGTGTATAAGAGACAGTGGAGCTGAGCAGCCTGAGATCTGA	F
IGH Primer Set 3	0.14 µM	CAATGACCAACATGGACCCTGTGGA	TCGTCGGCAGCGTCAGATGTGTATAAGAGACAG	TCGTCGGCAGCGTCAGATGTGTATAAGAGACAGCAATGACCAACATGGACCCTGTGGA	F
IGH Primer Set 3	0.14 µM	TCTGCAAATGAACAGCCTGAGAGCC	TCGTCGGCAGCGTCAGATGTGTATAAGAGACAG	TCGTCGGCAGCGTCAGATGTGTATAAGAGACAGTCTGCAAATGAACAGCCTGAGAGCC	F
IGH Primer Set 3	0.14 µM	GAGCTCTGTGACCGCCGCGGACACG	TCGTCGGCAGCGTCAGATGTGTATAAGAGACAG	TCGTCGGCAGCGTCAGATGTGTATAAGAGACAGGAGCTCTGTGACCGCCGCGGACACG	F
IGH Primer Set 3	0.14 µM	CAGCACCGCCTACCTGCAGTGGAGC	TCGTCGGCAGCGTCAGATGTGTATAAGAGACAG	TCGTCGGCAGCGTCAGATGTGTATAAGAGACAGCAGCACCGCCTACCTGCAGTGGAGC	F
IGH Primer Set 3	0.14 µM	GTTCTCCCTGCAGCTGAACTCTGTG	TCGTCGGCAGCGTCAGATGTGTATAAGAGACAG	TCGTCGGCAGCGTCAGATGTGTATAAGAGACAGGTTCTCCCTGCAGCTGAACTCTGTG	F
IGH Primer Set 3	0.14 µM	CAGCACGGCATATCTGCAGATCAG	TCGTCGGCAGCGTCAGATGTGTATAAGAGACAG	TCGTCGGCAGCGTCAGATGTGTATAAGAGACAGCAGCACGGCATATCTGCAGATCAG	F
TRB Primer Set 1+2	0.043 µM	AACTATGTTTTGGTATCGTCA	TCGTCGGCAGCGTCAGATGTGTATAAGAGACAG	TCGTCGGCAGCGTCAGATGTGTATAAGAGACAGAACTATGTTTTGGTATCGTCA	F
TRB Primer Set 1+2	0.043 µM	CACGATGTTCTGGTACCGTCAGCA	TCGTCGGCAGCGTCAGATGTGTATAAGAGACAG	TCGTCGGCAGCGTCAGATGTGTATAAGAGACAGCACGATGTTCTGGTACCGTCAGCA	F
TRB Primer Set 1+2	0.043 µM	CAGTGTGTCCTGGTACCAACAG	TCGTCGGCAGCGTCAGATGTGTATAAGAGACAG	TCGTCGGCAGCGTCAGATGTGTATAAGAGACAGCAGTGTGTCCTGGTACCAACAG	F
TRB Primer Set 1+2	0.043 µM	AACCCTTTATTGGTACCGACA	TCGTCGGCAGCGTCAGATGTGTATAAGAGACAG	TCGTCGGCAGCGTCAGATGTGTATAAGAGACAGAACCCTTTATTGGTACCGACA	F
TRB Primer Set 1+2	0.043 µM	ATCCCTTTTTTGGTACCAACAG	TCGTCGGCAGCGTCAGATGTGTATAAGAGACAG	TCGTCGGCAGCGTCAGATGTGTATAAGAGACAGATCCCTTTTTTGGTACCAACAG	F
TRB Primer Set 1+2	0.043 µM	AACCCTTTATTGGTATCAACAG	TCGTCGGCAGCGTCAGATGTGTATAAGAGACAG	TCGTCGGCAGCGTCAGATGTGTATAAGAGACAGAACCCTTTATTGGTATCAACAG	F
TRB Primer Set 1+2	0.043 µM	CGCTATGTATTGGTACAAGCA	TCGTCGGCAGCGTCAGATGTGTATAAGAGACAG	TCGTCGGCAGCGTCAGATGTGTATAAGAGACAGCGCTATGTATTGGTACAAGCA	F
TRB Primer Set 1+2	0.043 µM	CTCCCGTTTTCTGGTACAGACAGAC	TCGTCGGCAGCGTCAGATGTGTATAAGAGACAG	TCGTCGGCAGCGTCAGATGTGTATAAGAGACAGCTCCCGTTTTCTGGTACAGACAGAC	F
TRB Primer Set 1+2	0.043 µM	CGCTATGTATTGGTATAAACAG	TCGTCGGCAGCGTCAGATGTGTATAAGAGACAG	TCGTCGGCAGCGTCAGATGTGTATAAGAGACAGCGCTATGTATTGGTATAAACAG	F
TRB Primer Set 1+2	0.043 µM	TTATGTTTACTGGTATCGTAAGAAGC	TCGTCGGCAGCGTCAGATGTGTATAAGAGACAG	TCGTCGGCAGCGTCAGATGTGTATAAGAGACAGTTATGTTTACTGGTATCGTAAGAAGC	F
TRB Primer Set 1+2	0.043 µM	CAAAATGTACTGGTATCAACAA	TCGTCGGCAGCGTCAGATGTGTATAAGAGACAG	TCGTCGGCAGCGTCAGATGTGTATAAGAGACAGCAAAATGTACTGGTATCAACAA	F
TRB Primer Set 1+2	0.043 µM	ATACATGTACTGGTATCGACAAGAC	TCGTCGGCAGCGTCAGATGTGTATAAGAGACAG	TCGTCGGCAGCGTCAGATGTGTATAAGAGACAGATACATGTACTGGTATCGACAAGAC	F
TRB Primer Set 1+2	0.043 µM	GGCCATGTACTGGTATAGACAAG	TCGTCGGCAGCGTCAGATGTGTATAAGAGACAG	TCGTCGGCAGCGTCAGATGTGTATAAGAGACAGGGCCATGTACTGGTATAGACAAG	F
TRB Primer Set 1+2	0.043 µM	GTATATGTCCTGGTATCGACAAGA	TCGTCGGCAGCGTCAGATGTGTATAAGAGACAG	TCGTCGGCAGCGTCAGATGTGTATAAGAGACAGGTATATGTCCTGGTATCGACAAGA	F
TRB Primer Set 1+2	0.043 µM	TAACCTTTATTGGTATCGACGTGT	TCGTCGGCAGCGTCAGATGTGTATAAGAGACAG	TCGTCGGCAGCGTCAGATGTGTATAAGAGACAGTAACCTTTATTGGTATCGACGTGT	F
TRB Primer Set 1+2	0.043 µM	GGCCATGTACTGGTACCGACA	TCGTCGGCAGCGTCAGATGTGTATAAGAGACAG	TCGTCGGCAGCGTCAGATGTGTATAAGAGACAGGGCCATGTACTGGTACCGACA	F
TRB Primer Set 1+2	0.043 µM	TCATGTTTACTGGTATCGGCAG	TCGTCGGCAGCGTCAGATGTGTATAAGAGACAG	TCGTCGGCAGCGTCAGATGTGTATAAGAGACAGTCATGTTTACTGGTATCGGCAG	F
TRB Primer Set 1+2	0.043 µM	TTATGTTTATTGGTATCAACAGAATCA	TCGTCGGCAGCGTCAGATGTGTATAAGAGACAG	TCGTCGGCAGCGTCAGATGTGTATAAGAGACAGTTATGTTTATTGGTATCAACAGAATCA	F
TRB Primer Set 1+2	0.043 µM	CAACCTATACTGGTACCGACA	TCGTCGGCAGCGTCAGATGTGTATAAGAGACAG	TCGTCGGCAGCGTCAGATGTGTATAAGAGACAGCAACCTATACTGGTACCGACA	F
TRB Primer Set 1+2	0.043 µM	TACCCTTTACTGGTACCGGCAG	TCGTCGGCAGCGTCAGATGTGTATAAGAGACAG	TCGTCGGCAGCGTCAGATGTGTATAAGAGACAGTACCCTTTACTGGTACCGGCAG	F
TRB Primer Set 1+2	0.043 µM	ATACTTCTATTGGTACAGACAAATCT	TCGTCGGCAGCGTCAGATGTGTATAAGAGACAG	TCGTCGGCAGCGTCAGATGTGTATAAGAGACAGATACTTCTATTGGTACAGACAAATCT	F
TRB Primer Set 1+2	0.043 µM	CACGGTCTACTGGTACCAGCA	TCGTCGGCAGCGTCAGATGTGTATAAGAGACAG	TCGTCGGCAGCGTCAGATGTGTATAAGAGACAGCACGGTCTACTGGTACCAGCA	F
TRB Primer Set 1	0.11 µM	CGTCATGTACTGGTACCAGCA	TCGTCGGCAGCGTCAGATGTGTATAAGAGACAG	TCGTCGGCAGCGTCAGATGTGTATAAGAGACAGCGTCATGTACTGGTACCAGCA	F
TRB Primer Set 1	0.11 µM	CTTACCTACAACTGTGAATCTGGTG	GTCTCGTGGGCTCGGAGATGTGTATAAGAGACAG	GTCTCGTGGGCTCGGAGATGTGTATAAGAGACAGCTTACCTACAACTGTGAATCTGGTG	R
TRB Primer Set 1	0.11 µM	CTTACCTACAACGGTTAACCTGGTC	GTCTCGTGGGCTCGGAGATGTGTATAAGAGACAG	GTCTCGTGGGCTCGGAGATGTGTATAAGAGACAGCTTACCTACAACGGTTAACCTGGTC	R
TRB Primer Set 1	0.11 µM	CTTACCTACAACAGTGAGCCAACTT	GTCTCGTGGGCTCGGAGATGTGTATAAGAGACAG	GTCTCGTGGGCTCGGAGATGTGTATAAGAGACAGCTTACCTACAACAGTGAGCCAACTT	R
TRB Primer Set 1	0.11 µM	CATACCCAAGACAGAGAGCTGGGTTC	GTCTCGTGGGCTCGGAGATGTGTATAAGAGACAG	GTCTCGTGGGCTCGGAGATGTGTATAAGAGACAGCATACCCAAGACAGAGAGCTGGGTTC	R
TRB Primer Set 1	0.11 µM	CTTACCTAGGATGGAGAGTCGAGTC	GTCTCGTGGGCTCGGAGATGTGTATAAGAGACAG	GTCTCGTGGGCTCGGAGATGTGTATAAGAGACAGCTTACCTAGGATGGAGAGTCGAGTC	R
TRB Primer Set 1	0.11 µM	CATACCTGTCACAGTGAGCCTG	GTCTCGTGGGCTCGGAGATGTGTATAAGAGACAG	GTCTCGTGGGCTCGGAGATGTGTATAAGAGACAGCATACCTGTCACAGTGAGCCTG	R
TRB Primer Set 1	0.11 µM	CTTACCCAGTACGGTCAGCCT	GTCTCGTGGGCTCGGAGATGTGTATAAGAGACAG	GTCTCGTGGGCTCGGAGATGTGTATAAGAGACAGCTTACCCAGTACGGTCAGCCT	R
TRB Primer Set 1	0.11 µM	CTCGCCCAGCACGGTCAGCCT	GTCTCGTGGGCTCGGAGATGTGTATAAGAGACAG	GTCTCGTGGGCTCGGAGATGTGTATAAGAGACAGCTCGCCCAGCACGGTCAGCCT	R
TRB Primer Set 1	0.11 µM	CTTACCTGTAACCGTGAGCCTG	GTCTCGTGGGCTCGGAGATGTGTATAAGAGACAG	GTCTCGTGGGCTCGGAGATGTGTATAAGAGACAGCTTACCTGTAACCGTGAGCCTG	R
TRB Primer Set 2	0.25 µM	CCTTCTTACCTAGCACGGTGA	GTCTCGTGGGCTCGGAGATGTGTATAAGAGACAG	GTCTCGTGGGCTCGGAGATGTGTATAAGAGACAGCCTTCTTACCTAGCACGGTGA	R
TRB Primer Set 2	0.25 µM	CCCGCTTACCGAGCACTGTCA	GTCTCGTGGGCTCGGAGATGTGTATAAGAGACAG	GTCTCGTGGGCTCGGAGATGTGTATAAGAGACAGCCCGCTTACCGAGCACTGTCA	R
TRB Primer Set 2	0.25 µM	CCAGCTTACCCAGCACTGAGA	GTCTCGTGGGCTCGGAGATGTGTATAAGAGACAG	GTCTCGTGGGCTCGGAGATGTGTATAAGAGACAGCCAGCTTACCCAGCACTGAGA	R
TRB Primer Set 2	0.25 µM	CGCGCACACCGAGCAC	GTCTCGTGGGCTCGGAGATGTGTATAAGAGACAG	GTCTCGTGGGCTCGGAGATGTGTATAAGAGACAGCGCGCACACCGAGCAC	R
